1 *Research article*

2

3 **Tumor-derived extracellular vesicles regulate tumor-infiltrating regulatory T cells**  
4 **via the inhibitory immunoreceptor CD300a**

5

6 Yuta Nakazawa<sup>1,4</sup>), Kazumasa Kanemaru<sup>1,3</sup>), Chigusa Nakahashi-Oda<sup>1,3</sup>)\*, Akira  
7 Shibuya<sup>1,2,3,\*</sup>

8

9 <sup>1</sup>) Department of Immunology, Faculty of Medicine, <sup>2</sup>) Life Science Center for Survival  
10 Dynamics, Tsukuba Advanced Research Alliance (TARA), <sup>3</sup>) R & D Center for  
11 Innovative Drug Discovery, <sup>4</sup>) Doctoral Program of Biomedical Sciences, Graduate  
12 School of Comprehensive Human Sciences, University of Tsukuba, 1-1-1 Tennodai,  
13 Tsukuba, Ibaraki 305-8575, Japan

14

15 \*Correspondence to Akira Shibuya ([ashibuya@md.tsukuba.ac.jp](mailto:ashibuya@md.tsukuba.ac.jp)) or Chigusa  
16 Nakahashi-Oda ([chigusano@md.tsukuba.ac.jp](mailto:chigusano@md.tsukuba.ac.jp))

17

18 **Abstract**

19 Although tumor-infiltrating regulatory T (Treg) cells play a pivotal role in tumor  
20 immunity, how Treg cell activation are regulated in tumor microenvironments remains  
21 unclear. Here, we found that mice deficient in the inhibitory immunoreceptor CD300a  
22 on their dendritic cells (DCs) have increased numbers of Treg cells in tumors and  
23 greater tumor growth compared with wild-type mice after transplantation of B16  
24 melanoma. Pharmacological impairment of extracellular vesicle (EV) release decreased  
25 Treg cell numbers in CD300a-deficient mice. Coculture of DCs with tumor-derived EV  
26 (TEV) induced the internalization of CD300a and the incorporation of EVs into  
27 endosomes, in which CD300a inhibited TEV-mediated TLR3-TRIF signaling for  
28 activation of the IFN- $\beta$ -Treg cells axis. We also show that higher expression of CD300A  
29 was associated with decreased tumor-infiltrating Treg cells and longer survival time in  
30 patients with melanoma. Our findings reveal the role of TEV and CD300a on DCs in  
31 Treg cell activation in the tumor microenvironment.

32

**33 Introduction**

34 CD4<sup>+</sup> regulatory T (Treg) cells specifically expressing Foxp3 play an essential role for  
35 maintaining peripheral tolerance, preventing autoimmunity and limiting chronic  
36 inflammatory diseases. Deficiency in Treg cells due to genetic inactivation of *Foxp3* or  
37 impaired induction of Treg cells after birth results in lethal auto-inflammatory  
38 syndromes (Kim et al., 2007; Ramsdell and Ziegler, 2014). Treg cells are found at  
39 various tissues, including tumors, at various frequencies. Because tumor-infiltrating  
40 Treg cells suppress the activation of tumor antigen-specific CD8<sup>+</sup> T cells, a greater  
41 proportion of Treg cells to CD8<sup>+</sup> T cells among tumor-infiltrating lymphocytes is  
42 associated with poor prognosis in several cancers (Nishikawa and Sakaguchi, 2010).  
43 Indeed, Treg cell depletion dramatically reduces tumor burden (Klages et al., 2010).  
44 Current clinical trials are evaluating strategies targeting receptors (CD25, CTLA-4,  
45 CCR4, OX40 and GITR) preferentially expressed on intratumoral Treg cells  
46 (Nishikawa and Sakaguchi, 2010; Shitara and Nishikawa, 2018). The migration of  
47 Treg cells and their activation and proliferation are regulated by chemoattractants  
48 (Adeegbe and Nishikawa, 2013; Ondondo et al., 2013) and cytokines such as

49 TGF- $\beta$  and IL-10 (Hsu et al., 2015; Wan and Flavell, 2007). However, how Treg cell  
50 activation and proliferation are regulated in the tumor microenvironments remains  
51 unclear.

52 Extracellular vesicles (EVs) are the particles released from the cell that are  
53 delimited by a lipid bilayer containing functional biomolecules (proteins, lipids,  
54 mRNAs, microRNAs, and DNA fragments) that can be transferred to other cells (Niel  
55 et al., 2018; Witwer and Théry, 2019). More than 4,000 trillion EVs are presumed to  
56 be in the blood of cancer patients (Melo et al., 2015) and EVs released from tumor  
57 cells (tumor-derived EVs;TEVs) are emerging as critical messengers in tumor  
58 progression and metastasis (Couto et al., 2018; Grange et al., 2011; Melo et al.,  
59 2015; Skog et al., 2008). In tumor immunity, the deleterious role of TEV has been  
60 reported that, Fas ligand and PD-L1, the immunomodulatory molecules, on the surface  
61 of TEV induce apoptosis or suppression of activated T cells (Andreola et al., 2002;  
62 Chen et al., 2018) and TGF- $\beta$ 1 in TEV induces Treg cells (Clayton et al., 2007).  
63 Furthermore, macrophages that capture microRNA within EVs are altered to M2  
64 macrophages and promote the malignant behavior of cancers (Wang et al., 2018; Ying

65 et al., 2016). However, how exosomes regulate immune responses against tumors is  
66 not yet fully understood.

67           The mouse CD300 family molecules, which are encoded by 9 genes on  
68 chromosome 11, are expressed on myeloid cells including macrophages, dendritic cells,  
69 mast cells and granulocytes and either activate or inhibit innate immune responses  
70 (Borrego, 2013; Voss et al., 2015). On the other hand, the human CD300 family  
71 consists of 7 molecules encoded by genes located on chromosome 17 in a region  
72 syntenic to mouse chromosome 11 (Clark et al., 2001). CD300a, one of the CD300  
73 molecules in mouse, contains an immunoreceptor tyrosine-based inhibitory motif in its  
74 cytoplasmic portion. It mediates an inhibitory signal via SHP-1 and SHP-2 by binding  
75 to phosphatidylserine, which is exposed on the outer leaflet of the plasma membrane on  
76 apoptotic cells and activated mast cells under degranulation (Nakahashi-Oda et al.,  
77 2012; Wang et al., 2019; Yotsumoto et al., 2003). Upon binding to  
78 phosphatidylserine, CD300a inhibits TLR4-mediated signaling in mast cells and DCs,  
79 which results in the suppression of cytokine and chemokine production and modulation  
80 of inflammatory immune responses (Nakahashi-Oda et al., 2016, 2012b).

81            Here, we investigated the role of CD300a in tumor development and  
82 demonstrate that CD300a inhibits TEV-mediated interferon- $\beta$  (IFN- $\beta$ ) production by  
83 DCs and suppresses the activation of tumor-infiltrating Treg cells and tumor  
84 development.

85

86 **Results**87 **CD300a on DCs enhances anti-tumor immunity.**

88 To address whether CD300a is involved in tumor immunity, wild-type and  
89 CD300a-deficient (*Cd300a*<sup>-/-</sup>) mice were transplanted intradermally with B16 melanoma  
90 cells. The *Cd300a*<sup>-/-</sup> mice showed larger tumor volume and shorter survival than did  
91 wild-type mice (Fig. 1A and B), indicating that CD300a suppresses the development of  
92 melanoma. In contrast, Rag-deficient (*Rag1*<sup>-/-</sup>) and *Rag1*<sup>-/-</sup>*Cd300a*<sup>-/-</sup> mice showed  
93 comparable levels of tumor development and survival after injection of B16 melanoma  
94 cells (Fig. 1C and D). These results indicate that the suppressive effect of CD300a on  
95 melanoma development is dependent on the adaptive immune response. However, we  
96 also observed that CD300a was not expressed on tumor-infiltrating lymphocytes but  
97 was broadly expressed on myeloid cells, including populations of Ly6G<sup>+</sup> neutrophils,  
98 CD11c<sup>+</sup>~<sup>high</sup> DCs, and CD11c<sup>low</sup>CD11b<sup>+</sup> macrophages (Fig. S1A-C). These results  
99 suggest that CD300a expressed on myeloid cells suppresses melanoma development via  
100 adaptive immune responses. To identify the CD300a-expressing myeloid cell population  
101 that is involved in melanoma suppression, we used *Cd300a*<sup>fl/fl</sup> *Itgax*-Cre and *Cd300a*<sup>fl/fl</sup>

102 *Lys2-Cre* mice. *Cd300a<sup>fl/fl</sup> Itgax-Cre* mice expressed CD300a on Ly6G<sup>+</sup> cells and  
 103 CD11c<sup>-</sup> cells, but not on CD11c<sup>+~high</sup> cells (Fig. S1A). In contrast, *Cd300a<sup>fl/fl</sup> Lys2-Cre*  
 104 mice express CD300a on CD11c<sup>+~high</sup> cells and the subpopulation of CD11c<sup>low</sup> cells, but  
 105 not on Ly6G<sup>+</sup> cells (Fig. S1A). Although tumor growth was comparable between  
 106 *Cd300a<sup>fl/fl</sup> Lys2-Cre* and *Cd300a<sup>fl/fl</sup>* mice, *Cd300a<sup>fl/fl</sup> Itgax-Cre* mice showed greater  
 107 tumor volume than did *Cd300a<sup>fl/fl</sup>* mice (Fig. 1E). These data implicated CD300a on  
 108 DCs, rather than on neutrophils or macrophages, in inducing the adaptive immune  
 109 response to inhibit tumor development.

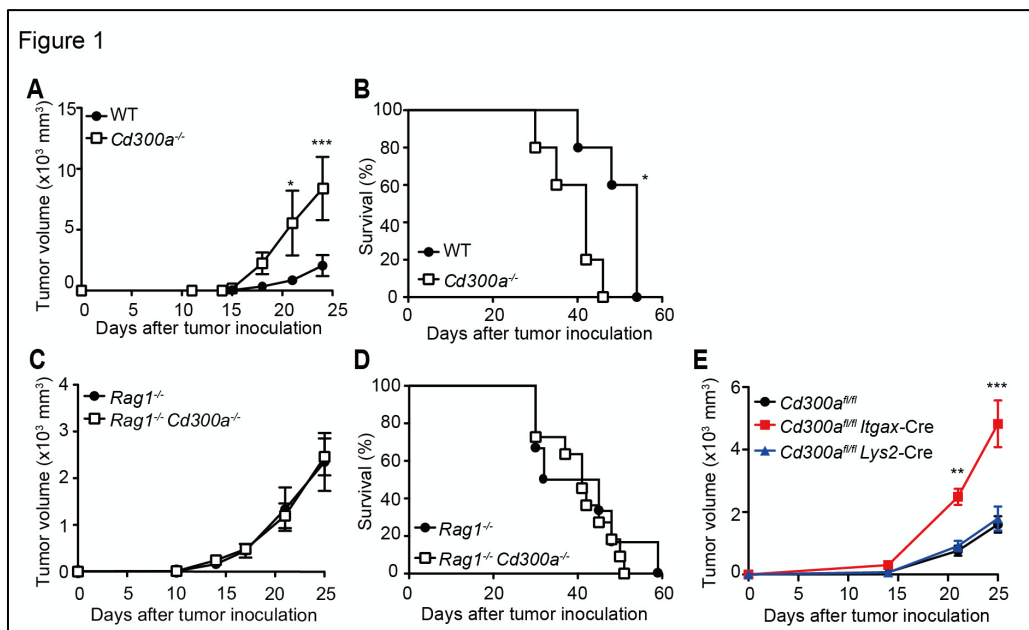

**Figure 1. CD300a suppresses tumor growth.**

(A-E) Tumor growth and survival curves of wild-type (WT, n = 5 in A and B), *Cd300a<sup>-/-</sup>* (n = 5 in A and B), *Rag1<sup>-/-</sup>* (n = 11 in C and n = 6 in D), *Rag1<sup>-/-</sup> Cd300a<sup>-/-</sup>* (n = 11 in C and n = 6 in D), *Cd300a<sup>fl/fl</sup>* (n = 7), *Cd300a<sup>fl/fl</sup> Itgax-Cre* (n = 13), and *Cd300a<sup>fl/fl</sup> Lys2-Cre* mice (n = 15) that were inoculated with  $1 \times 10^5$  B16 melanoma cells on day 0. Data are given as means  $\pm$  SEMs. \* $P < 0.05$ , \*\* $P < 0.01$  and \*\*\* $P < 0.001$ .  $P$  values were obtained by using a two-way ANOVA followed by Bonferroni's post-test (A and C) and the log-rank test (B and D). Data were pooled from two (A, B and C) or three (D and E) independent experiments.



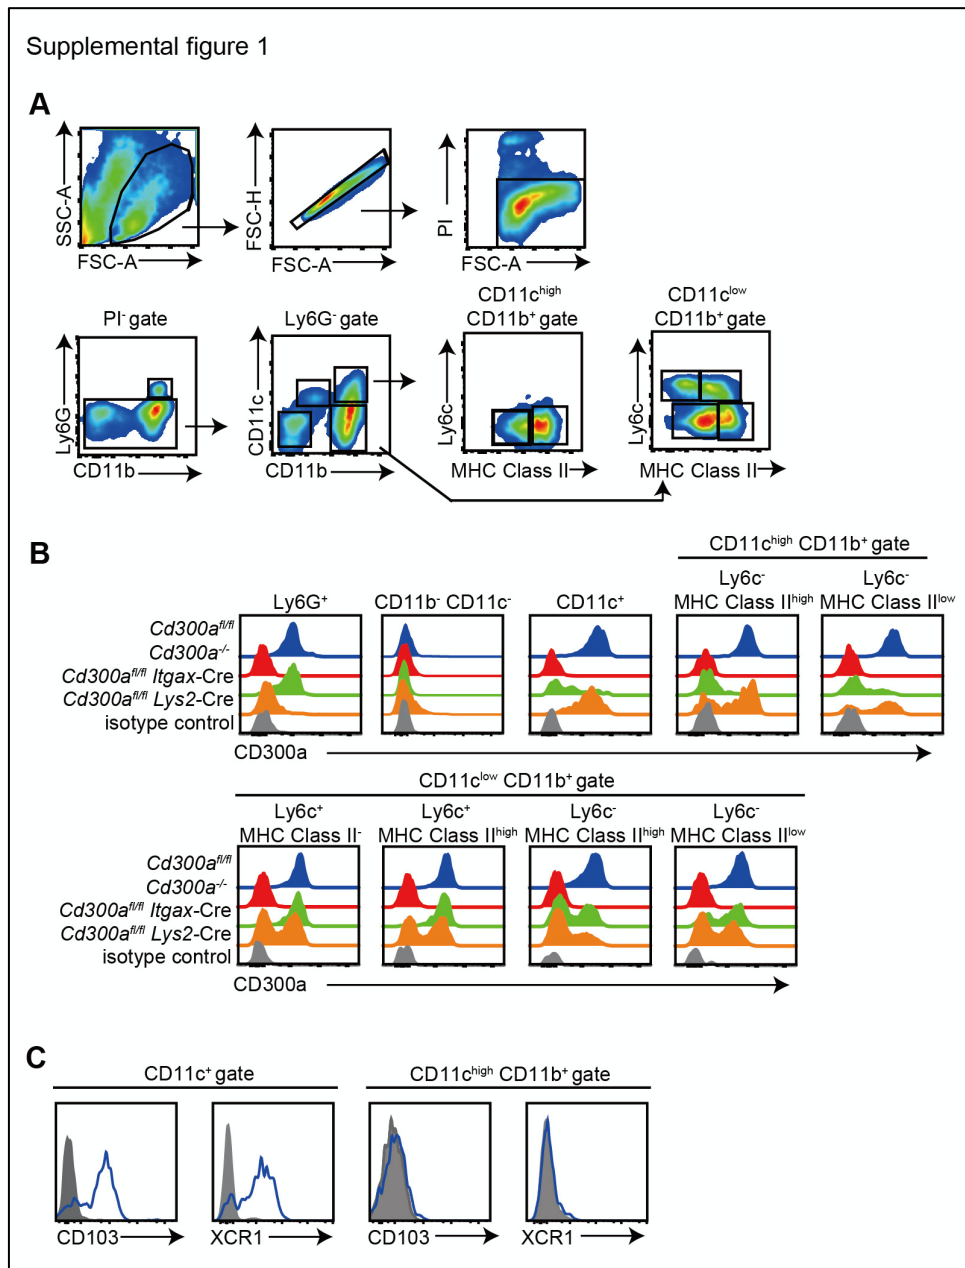

**Supplemental figure 1. Expression of CD300a on myeloid cell lineages in tumor infiltrating cells in B16 melanoma.**

(A-C) Cells isolated from B16 melanoma tissues of *Cd300a<sup>fl/fl</sup>*, *Cd300a<sup>-/-</sup>*, *Cd300a<sup>fl/fl</sup> Itgax-Cre* and *Cd300a<sup>fl/fl</sup> Lys2-Cre* mice prepared 14 days after inoculation were stained with propidium iodide (PI), biotin-conjugated anti-CD300a, APC-Cy7-conjugated CD11b, PE-conjugated Ly6G, FITC-conjugated CD11c, PE-Cy7-conjugated MHC class II, and Alexa-700-conjugated Ly6c antibodies, followed by SA-conjugated APC and analyzed by flow cytometry. (A) The populations of Ly6G<sup>+</sup>, CD11c<sup>+</sup>, CD11c<sup>high</sup>CD11b<sup>+</sup>Ly6C<sup>-</sup>MHC-II<sup>high</sup>, CD11c<sup>high</sup>CD11b<sup>+</sup>Ly6C<sup>+</sup>MHC-II<sup>low</sup>, CD11c<sup>low</sup>CD11b<sup>+</sup>Ly6C<sup>+</sup>MHC-II<sup>-</sup>, CD11c<sup>low</sup>CD11b<sup>+</sup>Ly6C<sup>+</sup>MHC-II<sup>high</sup>, CD11c<sup>-</sup>CD11b<sup>+</sup>Ly6C<sup>+</sup>MHC-II<sup>high</sup>, and CD11c<sup>-</sup>CD11b<sup>+</sup>Ly6C<sup>+</sup>MHC-II<sup>low</sup> were gated on flow cytometry. (B) CD300a expression in each subpopulation is shown. (C) CD103 and XCR1 expression on both CD11c<sup>+</sup> and CD11b<sup>+</sup>CD11c<sup>+</sup> cells were analyzed by using specific mAbs. Data are representative of two independent experiments with similar results. Data are representative of three mice.

**111 CD300a regulates tumor-infiltrating Treg cells.**

112 Previous reports have demonstrated that the number of Treg cells in melanoma is  
113 correlated with accelerated tumor growth (Mougiakakos et al., 2010). In contrast,  
114 depletion of Treg cells leads to less melanoma growth. To elucidate how CD300a on  
115 DCs enhances the adaptive immune response against tumor development, we analyzed  
116 the population of tumor-infiltrating Treg cells by use of flow cytometry and  
117 immunohistochemistry. The Treg cell population was larger in the tumor, but not the  
118 draining lymph nodes, of *Cd300a*<sup>-/-</sup> mice compared with that of wild-type mice (Fig. 2A  
119 and **B**), whereas the tumor-infiltrating CD8<sup>+</sup> T cells in *Cd300a*<sup>-/-</sup> mice produced  
120 significantly less IFN- $\gamma$  than did those in wild-type mice (Fig. 2C). Furthermore, PD-1  
121 expression on tumor-infiltrating CD8<sup>+</sup> T cells in *Cd300a*<sup>-/-</sup> mice was significantly  
122 upregulated compared to that in WT (Fig. 2D), suggesting that tumor-infiltrating CD8<sup>+</sup>  
123 T cells in *Cd300a*<sup>-/-</sup> mice display more exhausted state as previously described (Sawant  
124 et al., 2019). To determine whether Treg cells were indeed involved in the exacerbated  
125 tumor growth of *Cd300a*<sup>-/-</sup> mice, we depleted Treg cells by using an anti-CD25  
126 monoclonal antibody (mAb) (Onizuka et al., 1999) (Fig. S2A). After Treg cell

127 depletion, the tumor volume of the *Cd300a*<sup>-/-</sup> mice decreased to a level comparable to  
 128 that seen in wild-type mice (Fig. 2E). Likewise, the tumor volume decreased in  
 129 *Cd300a*<sup>fl/fl</sup>*Itgax*-Cre mice to a comparable level to that in *Cd300a*<sup>fl/fl</sup> mice after depletion  
 130 of Treg cells (Fig. 2F). These results suggest that CD300a on DCs regulates the number  
 131 of tumor-infiltrating Treg cells, which plays a part in the suppression of tumor  
 132 development.

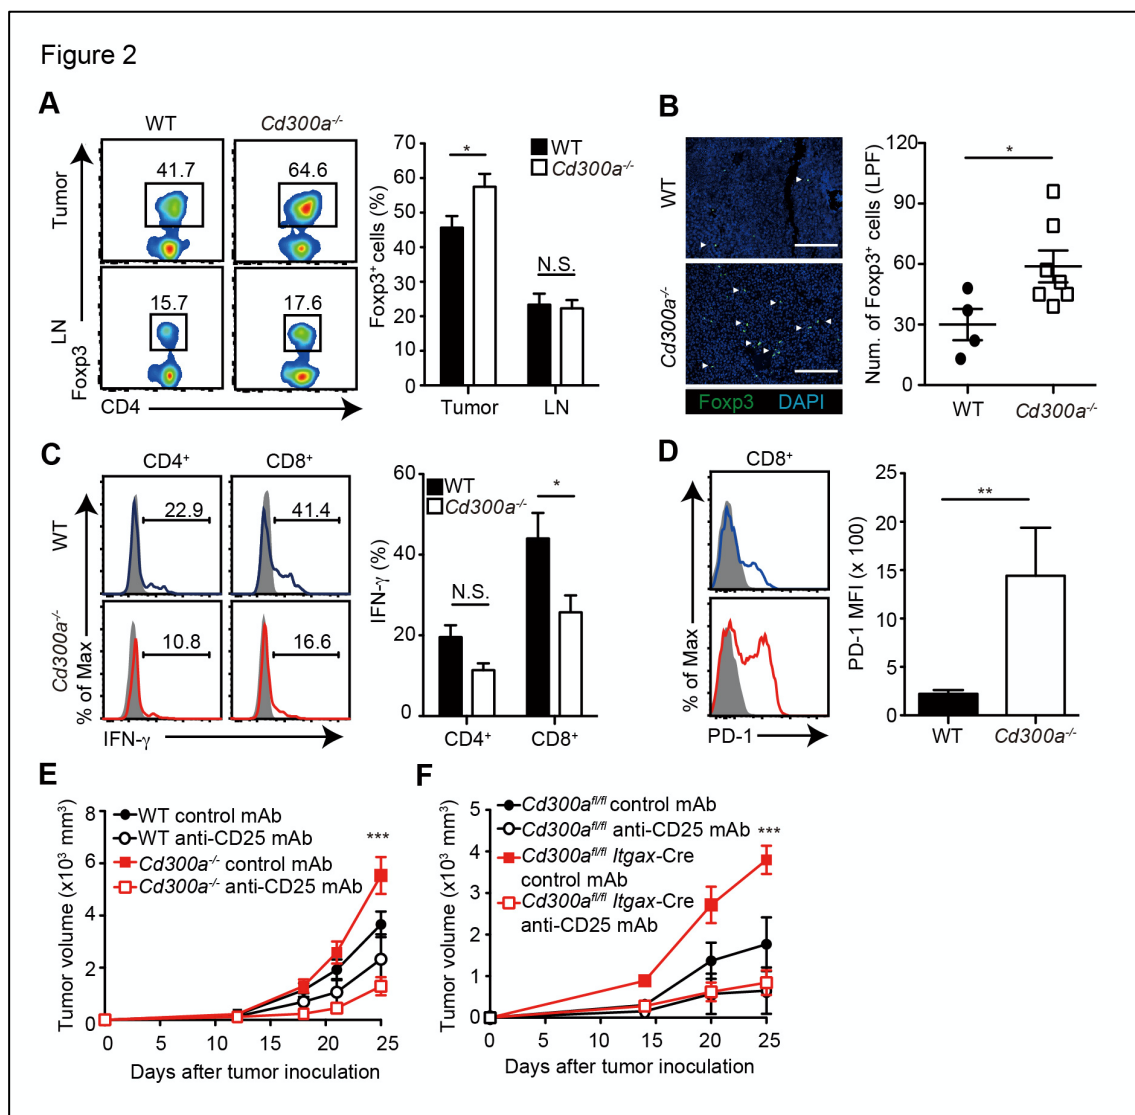

**Figure 2. Tumor-infiltrating Treg cells are regulated by CD300a.**

Tumor tissues were harvested 3 weeks after B16 melanoma inoculation. **(A)** Representative flow cytometry plots of Treg cells in the tumor and draining lymph node (LN) (left). Numbers adjacent to outlined areas indicate the percentage of Foxp3<sup>+</sup> (Treg) CD4<sup>+</sup> cells. The frequencies of Foxp3<sup>+</sup> cells among CD4<sup>+</sup> T cells in both wild-type (WT, n = 7) and *Cd300a*<sup>-/-</sup> mice (n = 8) are shown (right). **(B)** Fluorescence microscopy of tumor sections from Foxp3-eGFP WT (n = 4) and *Cd300a*<sup>-/-</sup> (n = 7) mice, stained with an anti-GFP monoclonal antibody (green) and the DNA-binding dye DAPI (left). The number of Foxp3<sup>+</sup> cells was quantified from 4 high-power fields (LPF) (right). White arrow shows Foxp3-positive cells. Scale bar, 200 μm. **(C)** Representative histogram of IFN-γ production from tumor-infiltrating T cells after PMA and ionomycin stimulation (left). The proportion of IFN-γ<sup>+</sup> cells is shown (right). (n = 6 in each group) **(D)** Representative histogram of PD-1 expression from tumor-infiltrating CD8<sup>+</sup> T cells 3 weeks after tumor inoculation (left). The MFI of PD-1 is shown (right). (n = 4 in WT, n = 6 in *Cd300a*<sup>-/-</sup> mice) **(E and F)** Tumor growth curve of WT mice (control mAb, n = 7; anti-CD25 mAb, n = 5) and *Cd300a*<sup>-/-</sup> (control mAb, n = 8; anti-CD25 mAb, n = 6) or *Cd300a*<sup>fl/fl</sup> (control mAb, n = 4; anti-CD25 mAb, n = 3) and *Cd300a*<sup>fl/fl</sup> *Itgax*-Cre (control mAb, n = 3; anti-CD25 mAb, n = 5) mice that were treated with a mAb to CD25 or a control antibody 3 times (Days -6, -3, and 0) and then inoculated with B16 melanoma cells. Data are given as means ± SEMs. N.S.; not significant. \**P*<0.05, \*\**P*<0.01 and \*\*\**P*<0.001. *P* values were obtained by using a two-way ANOVA followed by Bonferroni's post-test (**A**, **C**, **D**) and the student's *t*-test (**B** and **D**). Data were pooled from two (**B**, **D** and **E**) or three (**A**, **C** and **D**) independent experiments.

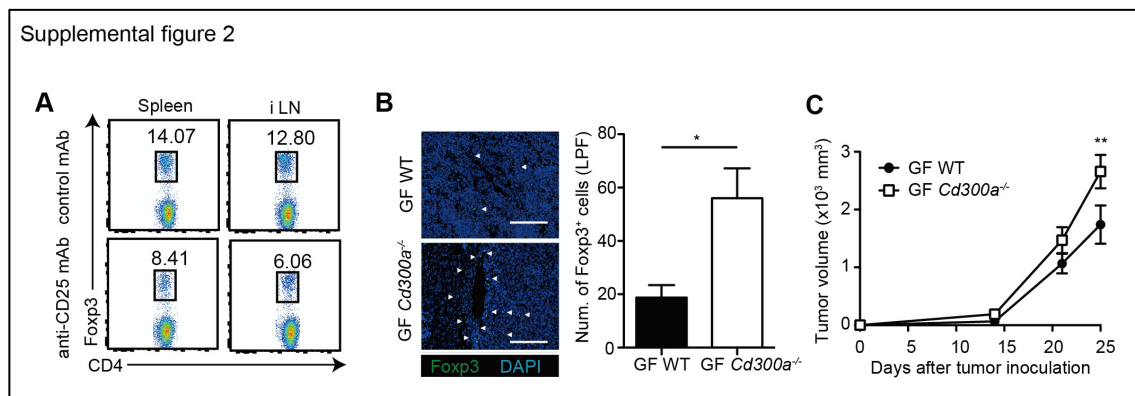**Supplemental figure 2. Tumor growth in *Cd300a*<sup>-/-</sup> mice is independent of the microbiota**

**(A)** Flow cytometric analysis of Foxp3<sup>+</sup> cells in the spleen and inguinal lymph node (iLN) of mice injected with isotype mAb and 300 μg of anti-CD25 mAb on Days -6 and -3 prior to analysis. **(B)** Representative fluorescence micrographs of tumor sections from germ-free (GF) wild-type (WT) and *Cd300a*<sup>-/-</sup> mice and stained with an anti-Foxp3 monoclonal antibody (green) and the DNA-binding dye DAPI (left). The number of Foxp3<sup>+</sup> cells was quantified from 4 high-power fields (LPF) (right). White arrows show Foxp3-positive cells. Scale bar, 200 μm. **(C)** Comparison of tumor growth of B16 melanoma between GF WT (n = 5) and *Cd300a*<sup>-/-</sup> mice (n = 6). Data are given as means ± SEMs. \**P*<0.05 and \*\**P*<0.01. *P* values were obtained by using the student's test (**B**) and a two-way ANOVA followed by Bonferroni's post-test (**C**). Data were pooled from two independent experiments (**A-C**).

134 **Tumor-derived exosomes augment IFN- $\beta$  production and consequent tumor**  
135 **development.**

136 We previously reported that a microbiota-mediated signal induces increased IFN- $\beta$   
137 production by DCs and increased numbers of Treg cells in the barrier tissues such as the  
138 intestine, skin, and airway of *Cd300a*<sup>-/-</sup> mice relative to those of wild-type mice  
139 (Nakahashi-Oda *et al.*, 2016). In the current study, we found that the expression of  
140 *Ifnb* was also higher in DCs in the tumor tissues of *Cd300a*<sup>-/-</sup> mice than in those of  
141 wild-type mice (Fig. 3A). To examine whether the microbiota is also involved in Treg  
142 cell levels in the tumor and tumor growth, we used wild-type and *Cd300a*<sup>-/-</sup> mice raised  
143 under the germ-free (GF) conditions. In contrast to the barrier tissues, *Cd300a*<sup>-/-</sup> mice  
144 still showed larger numbers of Treg cells and a larger tumor volume than did wild-type  
145 mice raised under GF conditions (Fig. S2B and C). These results suggest that, unlike in  
146 the barrier tissues, the microbiota-mediated signal was dispensable for the increased  
147 numbers of Treg cells in the tumor and for the enhanced tumor growth in *Cd300a*<sup>-/-</sup>  
148 mice.

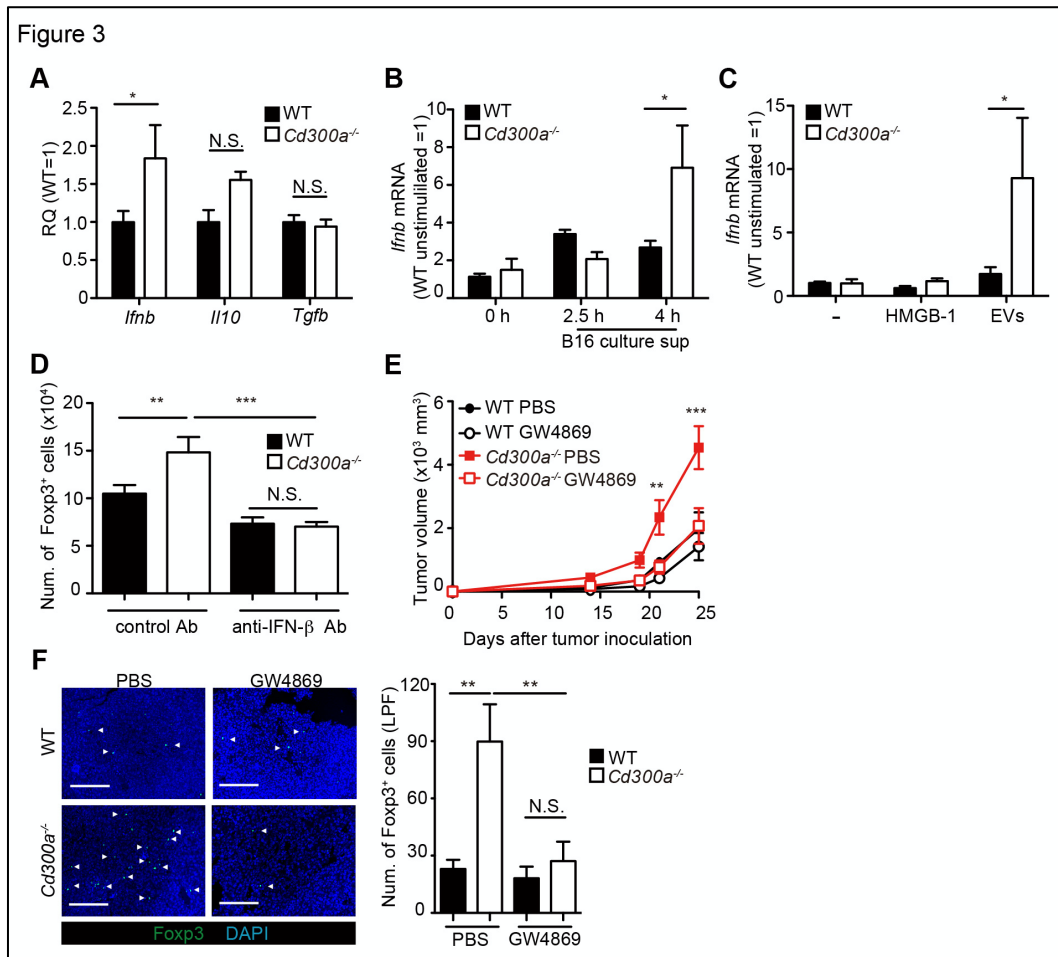

**Figure 3. Tumor-derived EVs facilitate IFN-β production from dendritic cells and promote tumor-infiltrating Treg cell accumulation.**

(A) Quantitative RT-PCR analysis of mRNA from CD11c<sup>+</sup> cells sorted from B16 melanoma in wild-type (WT, n = 6) and *Cd300a*<sup>-/-</sup> (n = 6) mice 2 weeks after tumor inoculation. Results are presented relative to those of the control gene encoding β-actin.

(B) Quantitative RT-PCR analysis of *Ifnb* in WT- and *Cd300a*<sup>-/-</sup>-derived BMDCs that received no treatment (0 h, n = 7) or B16 culture supernatants (2.5 h, n = 5; 4.0 h, n = 7).

(C) Quantitative RT-PCR analysis of *Ifnb* in WT- and *Cd300a*<sup>-/-</sup>-derived BMDCs that received no treatment (-) (n = 6 in each group) and were treated with HMGB-1 (n = 3 in each group) or B16-derived extracellular vesicles (EVs, n = 5 in each group).

(D) The number of induced FcγR3-eGFP<sup>+</sup> cells (iTreg) generated from naïve T cells by using anti-CD3, anti-CD28, IL-2 and TGF-β. These iTreg cells were cocultured with EV-stimulated BMDCs in the presence of IL-2 and TGF-β for 5 days with a control mAb (n = 7) or an anti-IFN-β mAb (n = 5).

(E) Tumor growth curves of WT (PBS, n = 6; GW4869, n = 9) and *Cd300a*<sup>-/-</sup> mice (PBS, n = 7; GW4869, n = 9) that were treated with GW4869 or PBS 3 times (Days 14, 18, and 21).

(F) Representative fluorescence micrographs of tumor sections from FcγR3-eGFP WT (PBS, n = 4; GW4869, n = 6) and FcγR3-eGFP *Cd300a*<sup>-/-</sup> mice (PBS, n = 5; GW4869, n = 6) in the absence or presence of GW4869, and stained with an anti-GFP monoclonal antibody (green) and the DNA-binding dye DAPI (left). The number of FcγR3<sup>+</sup> cells was quantified from 4 high-power fields (LPF) (right). White arrow shows FcγR3-positive cells. Scale bar, 200 μm. Data are given as means ± SEMs. RQ; relative quantification. N.S.; not significant. \**P*<0.05, \*\**P*<0.01 and \*\*\**P*<0.001. *P* values were obtained by using a one-way ANOVA (**D** and **F**) and a two-way ANOVA followed by Bonferroni's post-test (**A**, **B**, **C**, and **E**). Data were pooled from two (**D** and **F**) or three (**A**, **B**, **C** and **E**) independent experiments.

150                   Solid tumors lapse into necrosis in the core region under conditions of  
151 hypoxia and low pH, resulting in the secretion of several immune stimulators, such as  
152 danger-associated molecular patterns (DAMPs), DNA, RNA (Patidar et al., 2018) and  
153 EVs (Couto et al., 2018). We examined whether the culture supernatant of B16  
154 melanoma cells containing tumor-derived immune mediators had any effect on *Ifnb*  
155 expression by using cultured bone marrow-derived dendritic cells (BMDCs). Four hours  
156 after incubation in the presence of the culture supernatant, *Cd300a*<sup>-/-</sup> BMDCs expressed  
157 higher levels of *Ifnb* than did wild-type BMDCs (Fig. 3B), suggesting that CD300a  
158 suppressed the *Ifnb* expression induced by a tumor-derived immune mediator in the  
159 culture supernatant. Since EVs are the particles released from the cells that are  
160 delimited by a lipid bilayer that contains phosphatidylserine (Lima et al., 2009), the  
161 ligand for CD300a (Nakahashi-Oda et al., 2012a), and containing functional  
162 biomolecules (Niel et al., 2018), we focused on EVs. We purified EVs from the  
163 culture supernatants of B16 melanoma cells by centrifugation and phosphatidylserine  
164 receptor-conjugated beads (Fig. S3A), which indeed expressed phosphatidylserine on  
165 the surface and bound to a chimeric fusion protein of the extracellular portion of

166 CD300a with human IgG1 (Fig. S3B). Stimulation with the purified EVs induced higher  
 167 *Ifnb* expression in *Cd300a*<sup>-/-</sup> BMDCs than in wild-type BMDCs (Fig. 3C). In contrast,  
 168 neither wild-type nor *Cd300a*<sup>-/-</sup> BMDCs expressed IFN-β after stimulation with a  
 169 damage associated molecular patterns (DAMPs) high mobility group box-1 protein  
 170 (HMGB-1) (Fig. 3C), which can be released by damaged tumors. These results suggest  
 171 that CD300a suppresses TEV-induced IFN-β production in DCs.

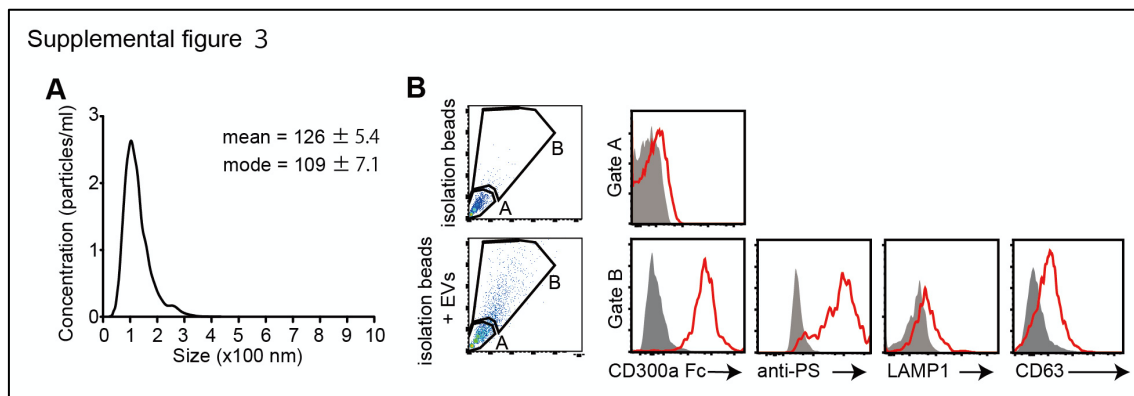

**Supplemental figure 3. CD300a binds to B16-derived EVs.**

(A) The size distribution of isolated B16-derived EVs was analyzed by NTA using NanoSight LM10. (B) Flow cytometric data of EVs isolated from B16 melanoma supernatants. Bead-conjugated EVs were analyzed by flow cytometry and characterized by the indicated antibody in the presence of 2 mM CaCl<sub>2</sub>.

172 To clarify whether IFN-β enhances Treg cell proliferation, we cocultured  
 173 TEV-stimulated wild-type or *Cd300a*<sup>-/-</sup> BMDCs with Treg cells that were generated  
 174 from naïve CD4<sup>+</sup> T cells from Foxp3-eGFP<sup>+</sup> mice in the presence of anti-CD3 and  
 175 anti-CD28 mAbs, IL-2, and TGF-β. TEV-stimulated *Cd300a*<sup>-/-</sup> BMDCs increased the



176 number of Treg cells to a greater extent than did TEV-stimulated wild-type BMDCs  
177 (Fig. 3D). Addition of a neutralizing anti-IFN- $\beta$  antibody to the coculture of Treg cells  
178 and *Cd300a*<sup>-/-</sup> BMDCs reduced the Treg cell numbers to a level comparable to that seen  
179 in the coculture of Treg cells and wild-type BMDCs (Fig. 3D), suggesting that IFN- $\beta$   
180 augmented Treg cell proliferation or survival. To investigate the effects of TEV on Treg  
181 cells, we injected an EV-release inhibitor GW4869 (Ikebuchi et al., 2018) into the  
182 tumor region on day 10, 14 and 18 after tumor inoculation. Treatment with GW4869 led  
183 to a significant decrease in the number of tumor-infiltrating Treg cells and the tumor  
184 volume (Fig. 3E and F). Taken together, these results indicate that CD300a suppresses  
185 EV-mediated IFN- $\beta$  production, resulting in a decrease in the Treg cell population and  
186 the suppression of tumor development.

187

### 188 **CD300a inhibits the EV-induced TLR3-TRIF signaling for IFN- $\beta$ production.**

189 To further analyze how CD300a regulates TEV-mediated IFN- $\beta$  production in DCs, we  
190 cocultured pHrodo- or PKH-labeled exosomes with wild-type or *Cd300a*<sup>-/-</sup> BMDCs and  
191 analyzed the localization of the TEVs in BMDCs by using confocal laser scanning

192 microscopy. We found that the TEVs were incorporated into endosomes, as identified  
193 by the expression of endosome antigen (EEA)-1, in both genotypes of DCs (Fig. 4A).  
194 The number of TEVs in the endosomes was comparable between wild-type and  
195 *Cd300a*<sup>-/-</sup> BMDCs (Fig. 4B), suggesting that CD300a did not affect TEV incorporation  
196 into the endosomes. Interestingly, we also found that CD300a was internalized from the  
197 cell surface into the endosomes, an event that might be mediated by the tyrosine-based  
198 sorting motif in the cytoplasmic region of CD300a (Yotsumoto *et al.*, 2003), after  
199 coculture of BMDCs with TEVs (Fig. 4C and Fig. S4A). As a result, the TEVs  
200 colocalized with CD300a at the endosomes (Fig. 4A and C). Given that EVs expose  
201 phosphatidylserine on their lipid bilayer, which is a CD300a ligand, these results  
202 suggest that CD300a was activated via stimulation with TEVs at the endosomes.

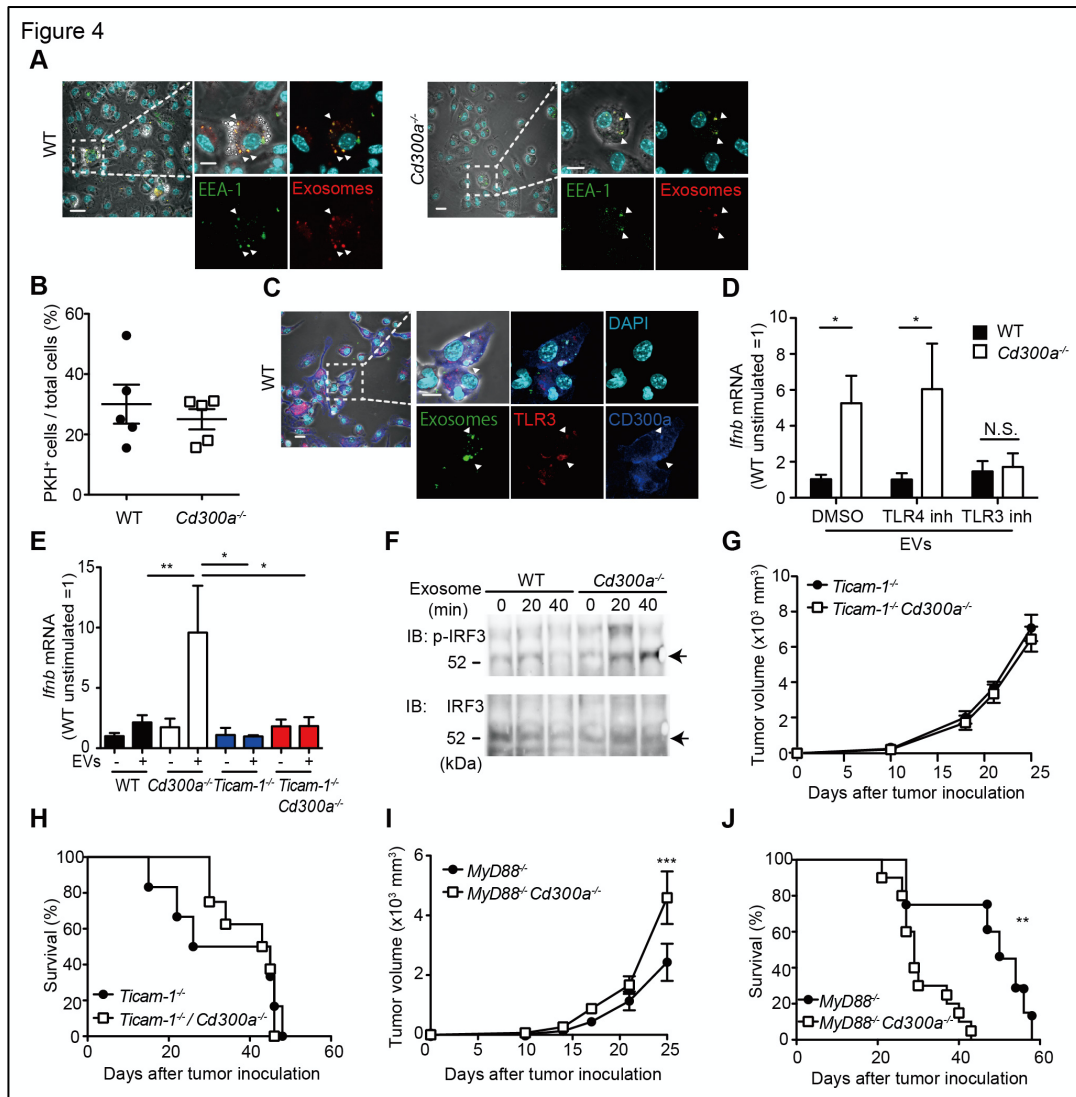

**Figure 4. CD300a inhibits TLR3-mediated IFN- $\beta$  expression upon recognition of tumor-derived EVs.**

(A) Representative microscopy images of wild-type (WT) and *Cd300a*<sup>-/-</sup> bone marrow-derived dendritic cells (BMDCs) treated with pHrodo-labeled EVs to assess the localization of EVs (red) and early endosome antigen (EEA)-1 (green). Scale bar, 10  $\mu$ m. Data are representative of two independent experiments. (B) Uptake of PKH-labeled TEVs in WT (n = 5) and *Cd300a*<sup>-/-</sup> BMDCs (n = 5). (C) Representative microscopy images of WT and *Cd300a*<sup>-/-</sup> BMDCs treated with pHrodo-labeled EVs to assess the localization of exosomes (green), TLR3 (red), and CD300a (blue). Scale bar, 10  $\mu$ m. Data are representative of two independent experiments. (D) Quantitative RT-PCR analysis of *Ifnb* in WT and *Cd300a*<sup>-/-</sup> BMDCs treated with B16-derived EVs in the presence of DMSO (WT, n = 9; *Cd300a*<sup>-/-</sup>, n = 10), 100 nM TLR4 inhibitor (n=7 in each group), and 50  $\mu$ M TLR3 inhibitor (n = 6 in each group). (E) Quantitative RT-PCR analysis of *Ifnb* in WT, *Cd300a*<sup>-/-</sup>, *ticam-1*<sup>-/-</sup>, and *ticam-1*<sup>-/-</sup> *Cd300a*<sup>-/-</sup> mice-derived BMDCs treated with B16-derived EVs (n = 5 in all group). (F) Representative immunoblot analysis of WT and *Cd300a*<sup>-/-</sup> BMDCs left unstimulated (0 min) or stimulated for the indicated times with B16-derived exosomes, followed by immunoblot analysis of phosphorylated (p-) IRF3 or total IRF3. Data are representative of two independent experiments. (G and H) Comparison of tumor growth and survival curves of B16 melanoma cells between *ticam-1*<sup>-/-</sup> (n = 6) and *ticam-1*<sup>-/-</sup> *Cd300a*<sup>-/-</sup> mice (n = 9) after inoculation of B16 melanoma. (I and J) Comparison of tumor growth and survival curves of B16 melanoma between *MyD88*<sup>-/-</sup> (n = 9) and *MyD88*<sup>-/-</sup> *Cd300a*<sup>-/-</sup> mice (n = 10) after inoculation of B16 melanoma. Data are given as means  $\pm$  SEMs. N.S.; not significant \**P*<0.05, \*\**P*<0.01 and \*\*\**P*<0.001. *P* values were obtained by using the student's *t*-test (B), a two-way ANOVA followed by Bonferroni's post-test (D, E, G and I) and the log-rank test (H and J). Data were pooled from two (B, E and H) or three (D, I and J) independent experiments.

204 EVs also contain nucleic acids, including structured RNA (Liu et al., 2016;  
205 Niel et al., 2018). TLR3 at the endosomal membrane can recognize RNA and mediates  
206 IFN- $\beta$  production via the TRIF signaling pathway in DCs (Tatematsu et al., 2013). To  
207 examine whether CD300a inhibited TLR3-mediated signaling at the endosomes upon  
208 stimulation with TEVs, we cocultured wild-type and *Cd300a*<sup>-/-</sup> BMDCs with TEVs in  
209 the presence of an inhibitor of TLR3 (Cheng et al., 2011). This inhibitor decreased  
210 *Ifnb* expression in *Cd300a*<sup>-/-</sup> BMDCs to a level comparable to that in wild-type BMDCs  
211 (Fig. 5D and Fig. S4B). In contrast, the TLR4 inhibitor TKA-242 did not affect the  
212 expression of *Ifnb* in either BMDC genotype (Fig. 4D and Fig. S4B). These results  
213 suggest that CD300a inhibits TLR3-mediated signaling for IFN- $\beta$  production. Moreover,  
214 the expression of *Ifnb* in *ticam-1*<sup>-/-</sup> *Cd300a*<sup>-/-</sup> BMDCs was also decreased to the  
215 comparable level of that in *ticam-1*<sup>-/-</sup> BMDCs after coculture with TEVs (Fig. 4E). In  
216 addition, we found that the phosphorylation level of interferon regulatory factor 3  
217 (IRF3), a downstream molecule of the TRIF signaling pathway, was increased to a  
218 greater extent in EV-stimulated *Cd300a*<sup>-/-</sup> BMDCs than in wild-type BMDCs (Fig. 4F).  
219 In vivo analyses also showed that, although tumor growth was significantly larger and

220 the survival rate was significantly shorter for B16 melanoma-injected *Myd88<sup>-/-</sup> Cd300a<sup>-/-</sup>*  
 221 mice compared with B16-injected *Myd88<sup>-/-</sup>* mice, tumor development and survival did  
 222 not differ between *ticam-1<sup>-/-</sup> Cd300a<sup>-/-</sup>* and *ticam-1<sup>-/-</sup>* mice (Fig. 4G-J). Taken together,  
 223 these data suggest that CD300a inhibits the TLR3-TRIF signaling pathway for IFN- $\beta$   
 224 production at the endosomes in DCs, resulting in the suppression of Treg cell activation  
 225 and tumor development.

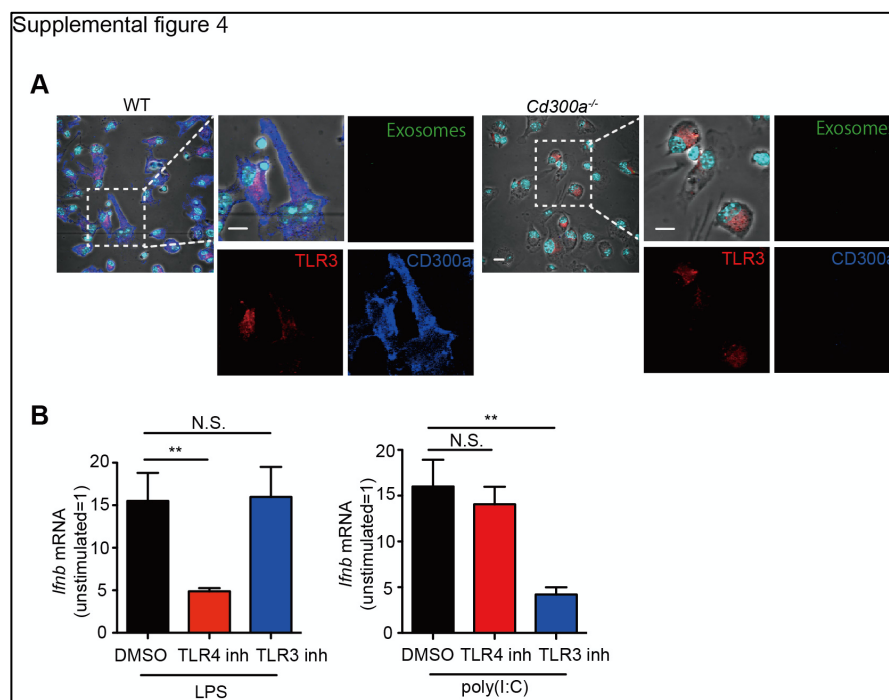

**Supplemental figure 4. CD300a is localized on the surface of plasma membrane without stimulation.**

(A) Representative confocal microscopy images of BMDCs stained with anti-TLR3 and anti-CD300a mAbs. (B) Quantitative RT-PCR analysis of *Ifnb* in BMDCs stimulated with LPS or poly(I;C) in the presence of TLR4 or TLR3 inhibitors (LPS and poly(I;C), n = 12 in each group; TLR4 and TLR3 inhibitors, n = 9 in each group). Data are given as means  $\pm$  SEMs. N.S.; not significant. \*\* $P < 0.01$ . *P* values were obtained by using a one-way ANOVA followed by Bonferroni's post-test (B). Data were pooled from two (A) three (B) independent experiments.

226 ***CD300A* expression associates with survival times in melanoma patients.**

227 To examine the role of *CD300A* in tumor development in humans, we analyzed the data  
228 on the single-cell RNA sequence of human melanoma tissues, which demonstrated that  
229 *CD300A* is expressed on populations that express *HLA-DR*, *ITGAX* (*CD11c*), *ITGAM*  
230 (*CD11b*), *CD14*, and *CD163* (Fig. S5), consistent with the results of mouse melanoma.  
231 We further analyzed the database of the Cancer Genome Atlas (TCGA) project and  
232 found that skin cutaneous melanoma patients (SKCM) expressing low levels of  
233 *CD300A* mRNA had shorter survival times than did those expressing higher *CD300A*  
234 mRNA levels (Fig. 5A). We also found that the expression ratio of *CD300A* to *ITGAX*  
235 is negatively correlated with that of *FOXP3* to *CD8A* (Fig. 5B). These results suggested  
236 that *CD300A* suppressed Treg cell proliferation and/or activation and tumor  
237 development. Moreover, we found that patients with melanoma showed strong positive  
238 correlation between *FOXP3* and *IFNBI* expression (Fig. 5C). Neutral  
239 sphingomyelinase-2 (*SMPD3*), which is a target of an inhibitor of EV release GW4869,  
240 enhances EV release from tumor cells (Kosaka et al., 2013, 2010). TCGA database of  
241 SKCM also showed a strong positive correlation between expressions of *SMPD3* and

242 *IFNB1* in melanoma tissues (Fig. 5D), suggesting that EVs increased IFN- $\beta$  expression  
 243 in human melanoma tissues. These results were consistent with those of mouse models  
 244 of melanoma development in the current study. Taken together, these results suggested  
 245 that CD300A might augment tumor immunity via suppression of tumor-infiltrating Treg  
 246 cells also in humans.

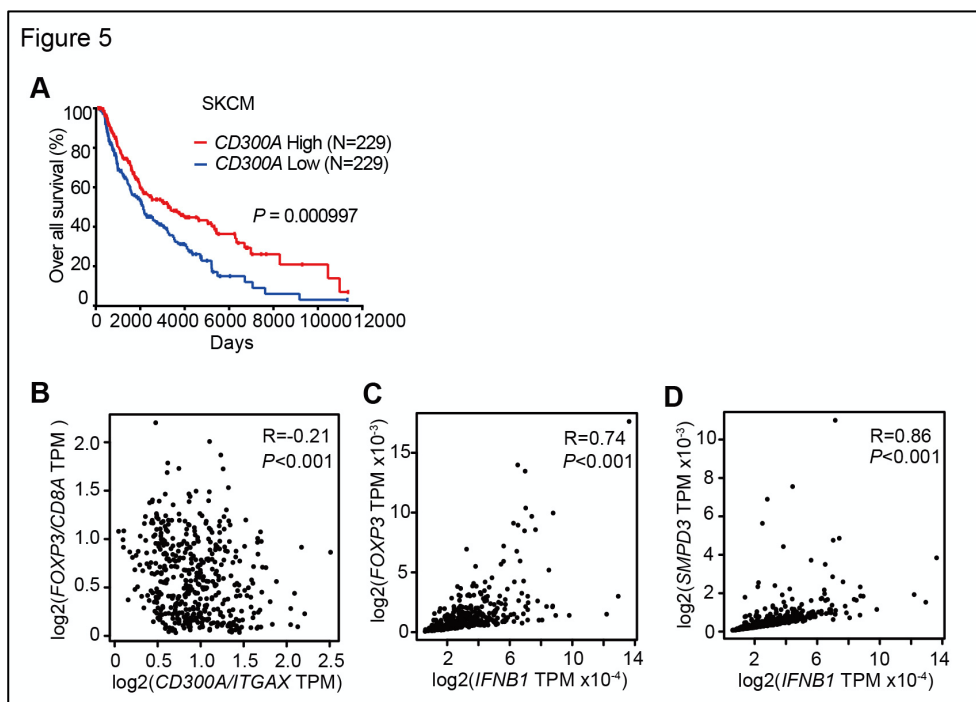

**Figure 5. *CD300A* expression associates with survival of human melanoma patients.**

(A) Kaplan plot showing low and high *CD300A* expressions in skin cutaneous melanoma (SKCM) patients obtained by performing a meta-analysis of TCGA database. Median values were used as thresholds. (numbers of both low and high expression patients = 229)  
 (B-D) Spearman correlation analysis of TCGA skin cutaneous melanoma database by using GEPIA2. *FOXP3*, *IFNB1* and *SMPD3* expression were normalized by *GAPDH* expression (C, D).

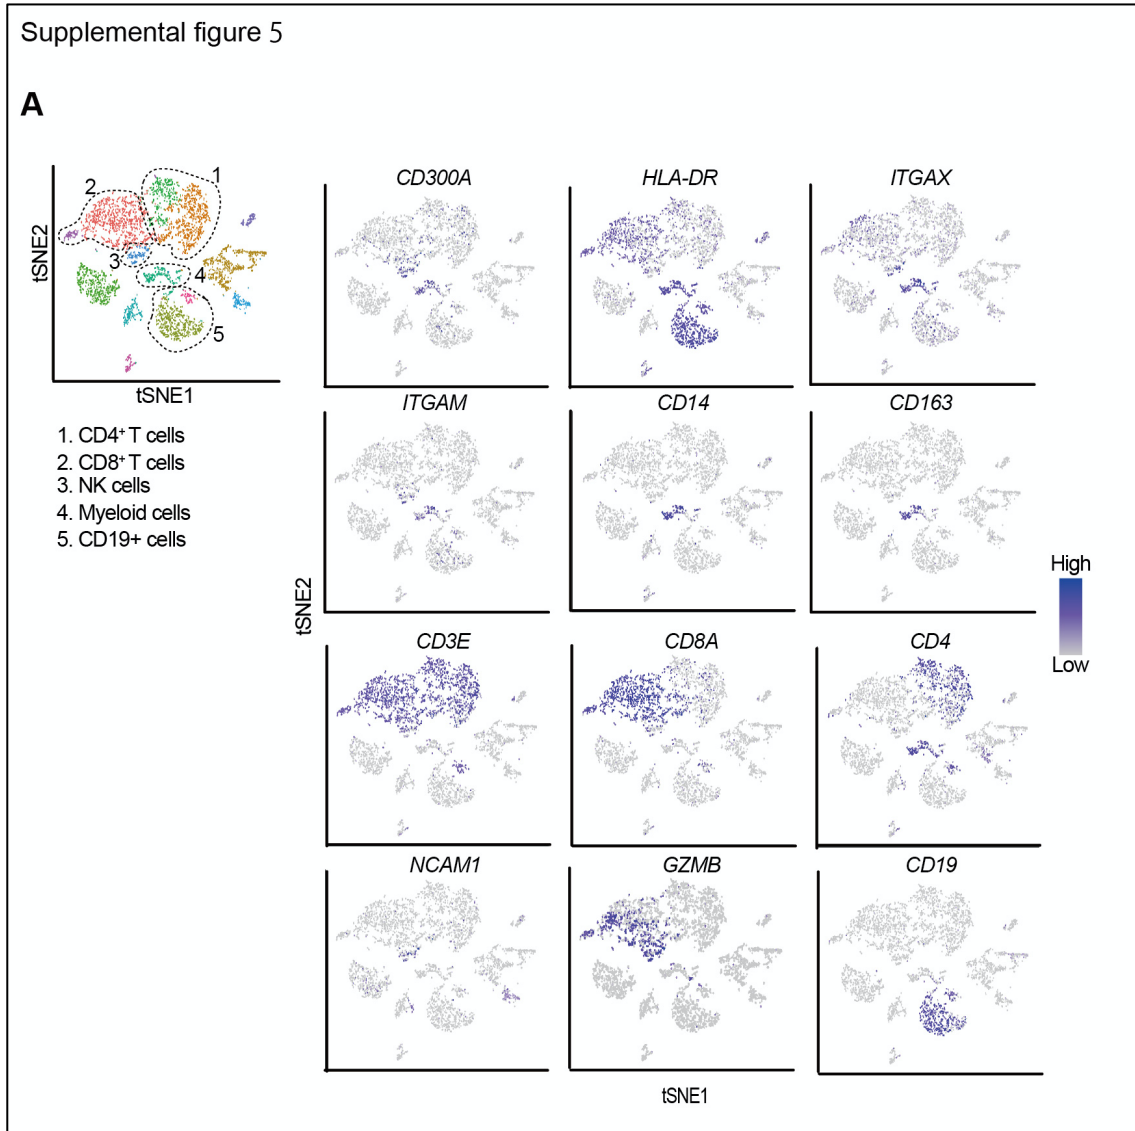

**Supplemental figure 5. tSNE plots of the immune cell landscape isolated from melanoma patients.**

Indicated gene expressions were reanalyzed by using GSE76056. Cell clusters of CD4<sup>+</sup> T cells, CD8<sup>+</sup> T cells, NK cells, myeloid cells and CD19<sup>+</sup> cells were determined by *CD4/CD3E*, *CD8A/CD3E*, *NCAM1(CD56)/GZMB*, *ITGAM(CD11b)/ITGAX(CD11c)/HLA-DR/CD14/CD163* and *CD19* expression, respectively.



248 **Discussion**

249 Although the biological roles of EVs have been reported from various angles, how EVs  
250 regulate immune responses is not yet fully understood. In the present study, we showed  
251 that TEV stimulated DCs for IFN- $\beta$  production via TLR3 at the endosomes, resulting in  
252 the increased number of tumor-infiltrating Treg cells and thus the exacerbation of tumor  
253 development. In contrast, the TEVs also stimulated CD300a and inhibited  
254 TEV-mediated TLR3 signaling at the endosome. Thus, TEVs have both positive and  
255 negative functions in the regulation of IFN- $\beta$  production and Treg activation via the axis  
256 of EV-derived RNA-TLR3 and EV-derived phosphatidylserine-CD300a, respectively.  
257 These results suggest that the Treg cells in tumor microenvironments is regulated by the  
258 balance of positive and negative signaling for IFN- $\beta$  production induced by TEV. Hence,  
259 it is an interesting issue to be examined whether the expressions of RNAs are different  
260 among TEVs derived from tumors of variable tissue types.

261 On the other hand, the balance of TLR3 and CD300a expressions in DCs may  
262 also be important for Treg activation and tumor development. Indeed, we showed that  
263 higher expression of CD300A was associated with lower expression of Foxp3 and

264 longer survival times of melanoma patients. While previous reports demonstrated that  
265 TEVs promoted Treg cell expansion through DCs-independent manner *in vitro* (Muller  
266 et al., 2017; Szajnik et al., 2010; Wieckowski et al., 2009), the current study first  
267 demonstrated that TEVs regulate Treg cell activation and tumor development *in vivo* by  
268 DCs in the tumor microenvironment. Meanwhile, Tumor-infiltrating DCs are  
269 heterogenous, and can be divided into at least two subsets. The conventional type-1 DC  
270 (cDC1) expresses the chemokine receptor XCR1 and CD103 and lower amount of  
271 CD11b that has the high ability to migrate from tumors to lymph nodes and presents a  
272 tumor antigen to CD8<sup>+</sup> T cells (Bedoui et al., 2009). In contrast, the conventional  
273 type-2 DC (cDC2) are commonly distinguished from cDC1 by their preferential  
274 expression of higher amount of CD11b. cDC2 are predominantly involved in antigen  
275 presentation by MHC class II to CD4<sup>+</sup> T cells (Gao et al., 2013). Given that cDC2 is  
276 involved in CD4<sup>+</sup> T cell differentiation and activation, CD300a on cDC2, rather than  
277 cDC1, may regulate Treg cells activation by inhibiting the TLR3-IFN- $\beta$  pathway in  
278 tumor microenvironment.

279           Type I IFNs are key players in antiviral and anticancer immune response by

280 upregulating both cross-presentation of antigens by CD8a<sup>+</sup> DCs and cytotoxic activity  
281 of CD8<sup>+</sup> T cells and NK cells (Zitvogel *et al.*, 2015). However, the current clinical use  
282 of IFN- $\beta$  for cancers showed limited efficiency (Medrano *et al.*, 2017; Minn, 2015).  
283 This might be, in part, because type I IFN also has immunosuppressive function. IFNs  
284 are most potent cytokines to induce PD-L1 on Treg cells (Morimoto *et al.*, 2018; Xiao  
285 *et al.*, 2018), which contributes to sustain Foxp3 expression and promotes the function  
286 of Treg cells (Francisco *et al.*, 2009). In addition, IFN- $\alpha/\beta$  receptor signaling  
287 promotes Treg cell development (Metidji *et al.*, 2015). We previously reported that  
288 gut commensals stimulated CX3CR1<sup>+</sup>CD103<sup>-</sup> CD11b<sup>+</sup> DCs to produce IFN- $\beta$ , which  
289 augmented the proliferation of Treg cells in the intestine (Nakahashi-Oda *et al.*,  
290 2016). In contrast, published reports demonstrated that, in viral infection and tumor  
291 microenvironment, type I IFNs directly inhibits the proliferation and activation of Treg  
292 cells (Gangaplara *et al.*, 2018; Srivastava *et al.*, 2014). Further investigations are  
293 required to clarify the molecular mechanism underlying this controversial issue.

294           We have previously reported that CD300a inhibited the CD14-mediated TLR4  
295 internalization in CD11b<sup>+</sup> DCs induced by gut microbiota (Nakahashi-Oda *et al.*,

296 2016). In the present study, we demonstrated that CD300a inhibited the  
297 TLR3-mediated TRIF signaling at the endosome. These results indicate that CD300a  
298 inhibits different TLRs-mediated signaling induced by different ligand providers. TLR3  
299 activates PI3 kinase and the downstream kinase, Akt, leading to full phosphorylation  
300 and activation of IRF3(Sarkar et al., 2004). Indeed, we showed that IRF3  
301 phosphorylation was increased in *Cd300a*<sup>-/-</sup> DCs compared with wild-type DCs after  
302 stimulation with TEV. Recent studies have revealed that TLR3 on alveolar epithelial  
303 cells recognized RNAs in TEV and promoted lung metastasis (Liu et al., 2016).  
304 Therefore, the role of RNAs in TEV is dependent on target cells. Our findings thus  
305 highlighted the role of TEV and CD300a on DCs in the regulation of tumor-infiltrating  
306 Treg cells and tumor immunity.  
307

308 **Materials & Methods**309 **Mice**

310 All gene-edited mice in the C57BL/6J background were previously  
311 described(Nakahashi-Oda et al., 2016). C57BL6J mice and GF mice were purchased  
312 from Clea Japan and Sankyo Laboratory, respectively. GF mice were bred and  
313 maintained in vinyl isolators to maintain GF conditions. Mice were used for the  
314 experiments at 8 to 12 weeks of age. All experiments were performed in accordance  
315 with the guidance of the animal ethics committee of the University of Tsukuba Animal  
316 Research Center.

317

318 **Antibodies, flow cytometry, and reagents**

319 The isotype-matched control antibodies rat IgG2a (553928), rat IgG1 (553921), and  
320 mouse IgG1 (553445), as well as mAbs to CD4 (RM4-5), CD8 (53-6.7), CD11b  
321 (M1/70), CD11c (HL3), I-A<sup>b</sup> (M5/114.15.2), Ly6C (AL-21), Ly6G (1A8), CD62L  
322 (MEL-14), CD44 (IM7), and IFN- $\gamma$  (XMG1.2) were purchased from BD Bioscience.  
323 Mabs to CD63 (NVG-2), CD103 (2E7), XCR1 (ZET) were purchased from Biolegend.

324 Anti-IFN- $\beta$  (7F-D3) was from Yamasa; control rat IgG (6130-01) was purchased from  
325 Southern Biotechnology. Anti-PS antibody (1H6) was purchased from Merck Millipore.  
326 The CD300a-specific mAb (EX42) was generated in our laboratory. Anti-CD25 (PC61)  
327 was a gift from E. Nakayama (Okayama University). Cells were treated for 10 min with  
328 anti-CD16/32 mAb (2.4G2; TOMBO Bioscience) to prevent binding to Fc $\gamma$ R prior to  
329 incubation with the indicated combination of antibodies. All samples were evaluated by  
330 using a Fortessa flow cytometer (Becton Dickinson) and analyzed by using FlowJo  
331 software (Tree Star).

332

### 333 **Tumor cell maintenance and injection**

334 The B16 mouse melanoma cells were obtained from RIKEN Cell Bank (Tsukuba,  
335 Japan). Cells were maintained in RPMI-1640 (Sigma) supplemented with 5% (v/v) fetal  
336 bovine serum (FBS) (Thermo Fisher). To inoculate the tumor cells into mice, cells were  
337 harvested by trypsinization, washed with sterile PBS, and injected intradermally ( $2 \times$   
338  $10^5$  cells/50  $\mu$ l sterile PBS/mouse) on the flank of each mouse. Tumor growth was  
339 measured every 3 or 4 days by using a caliper.

340

341 **Cell preparations**

342 For tumor-infiltrating Treg cell preparation, tumor tissues were harvested 3 weeks after  
343 tumor inoculation. Tumor tissues were cut into small pieces, incubated in 5% FBS  
344 RPMI-1640 in the presence of an enzyme mixture (Miltenyi Biotec) at 37°C for 45 min,  
345 and digested by using a gentleMACS Dissociator and tumor dissociation kit (Miltenyi  
346 Biotec), according to the manufacturer's instructions. Cells were filtered through 70- $\mu$ m  
347 nylon mesh and subsequently centrifuged using different concentrations of Percoll  
348 (Sigma-Aldrich) to exclude tissue debris and were washed with staining medium.

349 BMDCs were generated as described previously (Nakahashi-Oda *et al.*, 2016).

350 Briefly, bone marrow cells were cultured in a 10-cm culture dish in complete RPMI  
351 1640 containing 10% FBS in the presence of 10 ng/ml GM-CSF (WAKO) and 10 ng/ml  
352 IL-4 (WAKO) for 7 days. BMDCs were enriched by using CD11c MACS Beads  
353 (Miltenyi Biotec) to remove dead cells generated during BMDC development.

354

355 **Cytokine production from tumor infiltrating lymphocytes**

356 Cells were isolated from tumors in mice 3 weeks after inoculation, and stimulated for 4  
357 h with 50 ng/ml PMA and 500 ng/ml ionomycin. Brefeldin A (Sigma-Aldrich) was  
358 added for the last 3 h of culture. Cells were treated by using Foxp3 staining kits  
359 (eBioscience) and then stained with anti-IFN- $\gamma$  mAb.

360

### 361 **Immunohistochemistry and immunocytochemical staining**

362 Paraffin-embedded tumor samples were deparaffinized in xylene and a series of graded  
363 concentrations of alcohol. To block endogenous horseradish peroxidase (HRP), tissue  
364 sections were incubated in 0.3% hydrogen peroxidase in methanol for 30 min at room  
365 temperature. For antigen retrieval, the specimens were preheated in AR6 buffer  
366 (PerkinElmer). Samples were incubated with anti-GFP (D5.1) XP (Cell signaling) or  
367 Rat anti-Foxp3 (FJK-16s; Thermo Fisher) for 1 h at room temperature or overnight at  
368 4 °C, respectively and then incubated with appropriate secondary HRP-conjugated Abs.  
369 An HRP-conjugated dextran polymer system (PerkinElmer) was used for detection.  
370 After being washed with TBST, sections were mounted with  
371 4',6-diamidino-2-phenylindole (DAPI; Vector labs). For quantification of Foxp3<sup>+</sup> cells



372 in tumor tissues, tissue sections were scanned using BZ-X710 (Keyence). The number  
373 of Foxp3+ cells per high-power field in each area was automatically counted with  
374 hybrid cell counts software (Keyence). For immunocytochemical staining,  $1.0 \times 10^5$   
375 BMDCs were cultured in eight-well chamber slides (Thermo Fisher) and were  
376 stimulated with pHrodo Red ester or pHrodo STP Green (Thermo Fisher)-labeled  
377 exosomes. Cells were then fixed with 10% paraformaldehyde at 4 °C for 20 min,  
378 permeabilized with 0.3% Triton-X, and then stained with rat a mAb to EEA-1 (1G11;  
379 eBioscience) or TLR3 (11F8 ; Biolegend), followed by Alexa Flor 488-conjugated  
380 donkey anti-mouse IgG or Alexa Flor 546-conjugated goat anti-rat IgG (Invitrogen),  
381 respectively. Samples were evaluated by use of laser-scanning confocal microscopy  
382 (FV10i FLOUVIEW; Olympus).

383

#### 384 **In vivo depletion of Treg cells**

385 For in vivo depletion of Treg cells, mice were injected intraperitoneally with 300 µg of  
386 an anti-CD25 mAb (PC61) and an isotype control Ab on days -6, -3, and 0 before B16  
387 tumor inoculation.

388

389 **EV inhibitor treatment**

390 To inhibit EV generation, mice were injected with 1.0 mg/kg GW4869 (Ikebuchi et al.,  
391 2018; Kosaka et al., 2013) (Cayman Chemical) intratumorally on days 14, 18, and 21  
392 after tumor inoculation. Tumor tissues were harvested on day 25.

393

394 **Isolation and treatment of EVs**

395 B16 melanoma cells were cultured in complete RPMI supplemented with or without 2%  
396 bovine serum albumin. The culture medium was harvested and subjected to sequential  
397 centrifugation steps (first, 5 min for 2000G; second, 20 min for 10000G). EVs were  
398 purified by using an Exosome Isolation Kit (WAKO) according to the manufacturer's  
399 protocol. In brief, streptavidin magnetic beads, bound with biotinylated mouse Tim4-Fc,  
400 which is the phosphatidylserine receptors, were added to the culture medium of B16  
401 melanoma containing 2 mM CaCl<sub>2</sub>, and the mixture was rotated for 3 h or overnight at  
402 4 °C. The beads were washed three times with washing buffer and exosomes were  
403 eluted with elution buffer (Fig. S3A and B). For quantification of the EVs in the elution

404 buffer, the concentration of EV protein was quantified by using a BCA Protein Assay  
405 Kit (Novagen). For BMDC stimulation by EVs,  $2 \times 10^5$  BMDCs were incubated in the  
406 presence of 3 to 5  $\mu\text{g/ml}$  EVs for 2.5 h. To inhibit TLR3 and TLR4 signaling, a  
407 TLR3/dsRNA complex inhibitor (Merck) and a TLR4 inhibitor (TAK-242; Merck) were  
408 added to the cultures of BMDCs for 15 min before exosome stimulation.

409

#### 410 **Coculture of iTreg cells with EV-stimulated BMDCs**

411  $\text{CD4}^+$  T cells were enriched from the spleen cells by using mouse CD4 MACS Beads  
412 (L3T4, Miltenyi Biotec) and then  $\text{CD4}^+\text{CD44}^{\text{lo}}\text{CD62L}^{\text{high}}\text{Foxp3-eGFP}^-$  naïve T cells  
413 were purified by sorting with flow cytometry (FACS Aria III, Becton Dickinson).  
414 Inducible Treg cells were generated by culture of naïve  $\text{CD4}^+$  T cells in the presence of  
415 plate-coated 0.33  $\mu\text{g/ml}$  anti-CD3 Ab (145-2C11; TONBO), 2.0  $\mu\text{g/ml}$  soluble CD28  
416 (37.51; Biolegend), 20 ng/ml IL-2 (BD Pharmingen), and 2.5 ng/ml TGF- $\beta$  (R&D  
417 system) for 3 days. Inducible Treg cells ( $5 \times 10^4$  cells/well) were cultured with  
418 exosome-stimulated BMDCs ( $5 \times 10^4$  cells/well) in 96-well round-bottom plates in the  
419 presence of IL-2 and TGF- $\beta$  for 5 days.

420

421 **Quantitative real-time PCR analysis**

422 Total RNA was extracted from tumor-infiltrating CD11c<sup>+</sup> cells and BMDCs. Reverse  
423 transcription was performed with a High-Capacity cDNA Reverse Transcription Kit  
424 (Applied Biosystems). Quantitative PCR analysis was performed with Power SYBER  
425 Green PCR Master Mix (Applied Biosystem) by using an ABI 7500 sequence detector  
426 (Applied Biosystems). The PCR primers are as follows: *Ifnb* fwd,  
427 5'-cagctccaagaaaggacgaac-3'; *Ifnb* rev, 5'-ggcagtgaactcttctcat-3'; *Il10* fwd,  
428 5'-gctggacaacatactgctaacc-3'; *Il10* rev, 5'- atttccgataaggcttgga-3'; and *Tgfb* fwd,  
429 5'-tgacgtcactggagttgtacgg-3'; *Tgfb* rev, 5'-ggttcatgtcatggatgggtgc-3'; normalization of  
430 quantitative real-time PCR was performed based on the gene encoding  $\beta$ -actin.

431

432 **Western blots**

433 BMDCs were stimulated or unstimulated with exosomes for 20 or 40 min and lysed  
434 with 1% NP-40. The lysates of BMDCs were immunoblotted with antibody to  
435 phosphorylated IRF3 (4D4G; Cell Signaling Technology) or IRF3 (FL-425; Santa Cruz

436 Biotechnology).

437

438 **Bioinformatics**

439 For analysis of melanoma single cell RNA sequence (scRNA-seq), data were  
440 downloaded from the database of scRNA-seq analysis of melanoma (accession no.:  
441 GSE72056). The matrix data were passed to the R software package Seurat. Cells that  
442 had unique gene counts of less than 200 were excluded, as were all genes that  
443 were expressed in  $> 3$  cells. Counted data were log<sub>2</sub>-transformed and scaled by  
444 Seurat's *Scale Data* function. Principal component (PC) analysis was performed on a  
445 set of highly variable genes defined by Seurat's *FindVariableGenes* function. Genes  
446 associated the resulting PCs were then used for dimensionality reduction by using  
447 t-distributed stochastic neighbor embedding (tSNE). Cluster-based marker identification  
448 and differential expression were performed using Seurat's *FindAllmarkers*. RNA-seq  
449 and survival data were obtained from The Cancer Genome Atlas (TCGA) project and  
450 analyzed by using OncoLnc and GEPIA (Anaya, 2016; Tang et al., 2017).

451

452 **Statistical analyses**

453 Comparisons were performed using GraphPad Prism version 5.0 (GraphPad Software)  
454 by one-way or two-way ANOVA, followed by Bonferroni's multiple comparisons test  
455 or Student's unpaired t-test. Data are presented as means  $\pm$  SEMs, and differences are  
456 considered significant at  $P < 0.05$ .

457

458 **Acknowledgments**

459 We thank Hisako Furugen, Satoko Tochihara and Wakako Saito for secretarial  
460 assistance. This research was supported in part by grants provided by the Ministry of  
461 Education, Culture, Sports, Science, and Technology of Japan (grant numbers 18H05022  
462 and 16H06387 to A.S. and 19H03776 and 16H05350 to C.N-O.) and a grant-in-aid from  
463 the Japan Society for the Promotion of Science Fellows (grant number 17J06167 to Y.N.).

464

465 **Competing interests**

466 The authors declare no competing financial interests.

467

468 **References**

469

470

471 Adeegbe DO, Nishikawa H. 2013. Natural and Induced T Regulatory Cells in  
 472 Cancer. *Frontiers in Immunology* **4**:190. doi:10.3389/fimmu.2013.00190

473 Anaya J. 2016. OncoLnc: linking TCGA survival data to mRNAs, miRNAs, and  
 474 lncRNAs. *PeerJ Computer Science* **2**:e67. doi:10.7717/peerj-cs.67

475 Andreola G, Rivoltini L, Castelli C, Huber V, Perego P, Deho P, Squarcina P,  
 476 Accornero P, Lozupone F, Lugini L, Stringaro A, Molinari A, Arancia G,

477 Gentile M, Parmiani G, Fais S. 2002. Induction of lymphocyte apoptosis by  
 478 tumor cell secretion of FasL-bearing microvesicles. *The Journal of*  
 479 *experimental medicine* **195**:1303–16. doi:10.1084/jem.20011624

480 Bedoui S, Whitney PG, Waithman J, Eidsmo L, Wakim L, Caminschi I, Allan RS,  
 481 Wojtasiak M, Shortman K, Carbone FR, Brooks AG, Heath WR. 2009.

482 Cross-presentation of viral and self antigens by skin-derived CD103+  
 483 dendritic cells. *Nature Immunology* **10**:488–495. doi:10.1038/ni.1724

484 Borrego F. 2013. The CD300 molecules: an emerging family of regulators of the  
 485 immune system. *Blood* **121**:1951–60. doi:10.1182/blood-2012-09-435057

486 Chen G, Huang AC, Zhang W, Zhang G, Wu M, Xu W, Yu Z, Yang J, Wang B,  
 487 Sun H, Xia H, Man Q, Zhong W, Antelo LF, Wu B, Xiong X, Liu X, Guan L, Li

488 T, Liu S, Yang R, Lu Youtao, Dong L, McGettigan S, Somasundaram R,  
 489 Radhakrishnan R, Mills G, Lu Yiling, Kim J, Chen YH, Dong H, Zhao Y,

490 Karakousis GC, Mitchell TC, Schuchter LM, Herlyn M, Wherry EJ, Xu X,  
 491 Guo W. 2018. Exosomal PD-L1 contributes to immunosuppression and is

492 associated with anti-PD-1 response. *Nature* **560**:382–386.  
 493 doi:10.1038/s41586-018-0392-8

494 Cheng K, Wang X, Yin H. 2011. Small-molecule inhibitors of the TLR3/dsRNA  
 495 complex. *Journal of the American Chemical Society* **133**:3764–7.

496 doi:10.1021/ja111312h

497 Clark G, Cooper B, Fitzpatrick S, Green B, Hart D. 2001. The gene encoding the  
 498 immunoregulatory signaling molecule CMRF-35A localized to human

- 499 chromosome 17 in close proximity to other members of the CMRF-35 family.  
500 *Tissue antigens* **57**:415–23. doi:10.1034/j.1399-0039.2001.057005415.x
- 501 Clayton A, Mitchell JP, Court J, Mason MD, Tabi Z. 2007. Human  
502 tumor-derived exosomes selectively impair lymphocyte responses to  
503 interleukin-2. *Cancer research* **67**:7458–66.  
504 doi:10.1158/0008-5472.CAN-06-3456
- 505 Couto N, Caja S, Maia J, Moraes MC, Costa-Silva B. 2018. Exosomes as  
506 emerging players in cancer biology. *Biochimie* **155**:2–10.  
507 doi:10.1016/j.biochi.2018.03.006
- 508 Francisco LM, Salinas VH, Brown KE, Vanguri VK, Freeman GJ, Kuchroo VK,  
509 Sharpe AH. 2009. PD-L1 regulates the development, maintenance, and  
510 function of induced regulatory T cells. *The Journal of Experimental Medicine*  
511 **206**:3015–3029. doi:10.1084/jem.20090847
- 512 Gangaplara A, Martens C, Dahlstrom E, Metidji A, Gokhale AS, Glass DD,  
513 Lopez-Ocasio M, Baur R, Kanakabandi K, Porcella SF, Shevach EM. 2018.  
514 Type I interferon signaling attenuates regulatory T cell function in viral  
515 infection and in the tumor microenvironment. *PLoS pathogens* **14**:e1006985.  
516 doi:10.1371/journal.ppat.1006985
- 517 Gao Y, Nish SA, Jiang R, Hou L, Licona-Limón P, Weinstein JS, Zhao H,  
518 Medzhitov R. 2013. Control of T Helper 2 Responses by Transcription Factor  
519 IRF4-Dependent Dendritic Cells. *Immunity* **39**:722–732.  
520 doi:10.1016/j.immuni.2013.08.028
- 521 Grange C, Tapparo M, Collino F, Vitillo L, Damasco C, Deregibus MC, Tetta C,  
522 Bussolati B, Camussi G. 2011. Microvesicles released from human renal  
523 cancer stem cells stimulate angiogenesis and formation of lung premetastatic  
524 niche. *Cancer research* **71**:5346–56. doi:10.1158/0008-5472.CAN-11-0241
- 525 Hsu P, Santner-Nanan B, Hu M, Skarratt K, Lee C, Stormon M, Wong M, Fuller  
526 SJ, Nanan R. 2015. IL-10 Potentiates Differentiation of Human Induced  
527 Regulatory T Cells via STAT3 and Foxo1. *The Journal of Immunology*  
528 **195**:3665–3674. doi:10.4049/jimmunol.1402898
- 529 Ikebuchi Y, Aoki S, Honma M, Hayashi M, Sugamori Y, Khan M, Kariya Y, Kato  
530 G, Tabata Y, Penninger JM, Udagawa N, Aoki K, Suzuki H. 2018. Coupling of



- 531 bone resorption and formation by RANKL reverse signalling. *Nature*  
532 **561**:195–200. doi:10.1038/s41586-018-0482-7
- 533 Kim JM, Rasmussen JP, Rudensky AY. 2007. Regulatory T cells prevent  
534 catastrophic autoimmunity throughout the lifespan of mice. *Nature*  
535 *Immunology* **8**:191–197. doi:10.1038/ni1428
- 536 Klages K, Mayer CT, Lahl K, Loddenkemper C, Teng MWL, Ngiow SF, Smyth  
537 MJ, Hamann A, Huehn J, Sparwasser T. 2010. Selective Depletion of Foxp3+  
538 Regulatory T Cells Improves Effective Therapeutic Vaccination against  
539 Established Melanoma. *Cancer Research* **70**:7788–7799.  
540 doi:10.1158/0008-5472.CAN-10-1736
- 541 Kosaka N, Iguchi H, Hagiwara K, Yoshioka Y, Takeshita F, Ochiya T. 2013.  
542 Neutral sphingomyelinase 2 (nSMase2)-dependent exosomal transfer of  
543 angiogenic microRNAs regulate cancer cell metastasis. *The Journal of*  
544 *biological chemistry* **288**:10849–59. doi:10.1074/jbc.M112.446831
- 545 Kosaka N, Iguchi H, Yoshioka Y, Takeshita F, Matsuki Y, Ochiya T. 2010.  
546 Secretory Mechanisms and Intercellular Transfer of MicroRNAs in Living  
547 Cells. *Journal of Biological Chemistry* **285**:17442–17452.  
548 doi:10.1074/jbc.M110.107821
- 549 Lima LG, Chammas R, Monteiro RQ, Moreira MC, Barcinski MA. 2009.  
550 Tumor-derived microvesicles modulate the establishment of metastatic  
551 melanoma in a phosphatidylserine-dependent manner. *Cancer Letters* 168–  
552 175. doi:10.1016/j.canlet.2009.03.041
- 553 Liu Y, Gu Y, Han Y, Zhang Q, Jiang Z, Zhang X, Huang B, Xu X, Zheng J, Cao X.  
554 2016. Tumor Exosomal RNAs Promote Lung Pre-metastatic Niche Formation  
555 by Activating Alveolar Epithelial TLR3 to Recruit Neutrophils. *Cancer cell*  
556 **30**:243–56. doi:10.1016/j.ccell.2016.06.021
- 557 Medrano RF, Hunger A, Mendonça SA, Barbuto JM, Strauss BE. 2017.  
558 Immunomodulatory and antitumor effects of type I interferons and their  
559 application in cancer therapy. *Oncotarget* **8**:71249–71284.  
560 doi:10.18632/oncotarget.19531
- 561 Melo SA, Luecke LB, Kahlert C, Fernandez AF, Gammon ST, Kaye J, LeBleu VS,  
562 Mittendorf EA, Weitz J, Rahbari N, Reissfelder C, Pilarsky C, Fraga MF,

- 563 Piwnica-Worms D, Kalluri R. 2015. Glypican-1 identifies cancer exosomes  
564 and detects early pancreatic cancer. *Nature* **523**:177.  
565 doi:10.1038/nature14581
- 566 Metidji A, Rieder SA, Glass DD, Cremer I, Punksosy GA, Shevach EM. 2015.  
567 IFN- $\alpha/\beta$  receptor signaling promotes regulatory T cell development and  
568 function under stress conditions. *Journal of immunology (Baltimore, Md:*  
569 *1950)* **194**:4265–76. doi:10.4049/jimmunol.1500036
- 570 Minn AJ. 2015. Interferons and the Immunogenic Effects of Cancer Therapy.  
571 *Trends in Immunology* **36**:725–737. doi:10.1016/j.it.2015.09.007
- 572 Morimoto Y, Kishida T, Kotani S, Takayama K, Mazda O. 2018. Interferon- $\beta$   
573 signal may up-regulate PD-L1 expression through IRF9-dependent and  
574 independent pathways in lung cancer cells. *Biochemical and Biophysical*  
575 *Research Communications* **507**:330–336. doi:10.1016/j.bbrc.2018.11.035
- 576 Mouggiakakos D, Johansson CC, Trocme E, All-Ericsson C, Economou MA,  
577 Larsson O, Seregard S, Kiessling R. 2010. Intratumoral forkhead box  
578 P3-positive regulatory T cells predict poor survival in  
579 cyclooxygenase-2-positive uveal melanoma. *Cancer* **116**:2224–33.  
580 doi:10.1002/cncr.24999
- 581 Muller L, Simms P, Hong C-S, Nishimura MI, Jackson EK, Watkins SC,  
582 Whiteside TL. 2017. Human tumor-derived exosomes (TEX) regulate Treg  
583 functions via cell surface signaling rather than uptake mechanisms.  
584 *OncoImmunology* **6**:e1261243. doi:10.1080/2162402X.2016.1261243
- 585 Nakahashi-Oda C, Tahara-Hanaoka S, Honda S, Shibuya K, Shibuya A. 2012a.  
586 Identification of phosphatidylserine as a ligand for the CD300a  
587 immunoreceptor. *Biochemical and biophysical research communications*  
588 **417**:646–50. doi:10.1016/j.bbrc.2011.12.025
- 589 Nakahashi-Oda C, Tahara-Hanaoka S, Shoji M, Okoshi Y, Nakano-Yokomizo T,  
590 Ohkohchi N, Yasui T, Kikutani H, Honda S, Shibuya K, Nagata S, Shibuya A.  
591 2012b. Apoptotic cells suppress mast cell inflammatory responses via the  
592 CD300a immunoreceptor. *The Journal of experimental medicine* **209**:1493–  
593 503. doi:10.1084/jem.20120096
- 594 Nakahashi-Oda C, Udayanga K, Nakamura Y, Nakazawa Y, Totsuka N, Miki H,

- 595 Iino S, Tahara-Hanaoka S, Honda S, Shibuya K, Shibuya A. 2016. Apoptotic  
596 epithelial cells control the abundance of Treg cells at barrier surfaces. *Nature*  
597 *Immunology* **17**:441–450. doi:10.1038/ni.3345
- 598 Niel VG, D'Angelo G, cell RG reviews. 2018. Shedding light on the cell biology  
599 of extracellular vesicles. doi:10.1038/nrm.2017.125
- 600 Nishikawa H, Sakaguchi S. 2010. Regulatory T cells in tumor immunity.  
601 *International Journal of Cancer* **127**:759–767. doi:10.1002/ijc.25429
- 602 Ondondo B, Jones E, Godkin A, Gallimore A. 2013. Home sweet home: the  
603 tumor microenvironment as a haven for regulatory T cells. *Frontiers in*  
604 *immunology* **4**:197. doi:10.3389/fimmu.2013.00197
- 605 Onizuka S, Tawara I, Shimizu J, Sakaguchi S, Fujita T, Nakayama E. 1999.  
606 Tumor rejection by in vivo administration of anti-CD25 (interleukin-2  
607 receptor alpha) monoclonal antibody. *Cancer research* **59**:3128–33.
- 608 Patidar A, Selvaraj S, Sarode A, Chauhan P, Chattopadhyay D, Saha B. 2018.  
609 DAMP-TLR-cytokine axis dictates the fate of tumor. *Cytokine* **104**:114–123.  
610 doi:10.1016/j.cyto.2017.10.004
- 611 Ramsdell F, Ziegler SF. 2014. FOXP3 and scurfy: how it all began. *Nature*  
612 *reviews Immunology* **14**:343–9. doi:10.1038/nri3650
- 613 Sarkar SN, Peters KL, Elco CP, Sakamoto S, Pal S, Sen GC. 2004. Novel roles of  
614 TLR3 tyrosine phosphorylation and PI3 kinase in double-stranded RNA  
615 signaling. *Nature structural & molecular biology* **11**:1060–7.  
616 doi:10.1038/nsmb847
- 617 Sawant DV, Yano H, Chikina M, Zhang Q, Liao M, Liu C, Callahan DJ, Sun Z,  
618 Sun T, Tabib T, Pennathur A, Corry DB, Luketich JD, Lafyatis R, Chen W,  
619 Poholek AC, Bruno TC, Workman CJ, Vignali DAA. 2019. Adaptive plasticity  
620 of IL-10+ and IL-35+ Treg cells cooperatively promotes tumor T cell  
621 exhaustion. *Nature Immunology* **20**:724–735.  
622 doi:10.1038/s41590-019-0346-9
- 623 Shitara K, Nishikawa H. 2018. Regulatory T cells: a potential target in cancer  
624 immunotherapy. *Annals of the New York Academy of Sciences* **1417**:104–115.  
625 doi:10.1111/nyas.13625
- 626 Skog J, Würdinger T, Rijn S van, Meijer DH, Gainche L, Sena-Esteves M, Curry

- 627 WT, Carter BS, Krichevsky AM, Breakefield XO. 2008. Glioblastoma  
628 microvesicles transport RNA and proteins that promote tumour growth and  
629 provide diagnostic biomarkers. *Nature cell biology* **10**:1470–6.  
630 doi:10.1038/ncb1800
- 631 Srivastava S, Koch MA, Pepper M, Campbell DJ. 2014. Type I interferons  
632 directly inhibit regulatory T cells to allow optimal antiviral T cell responses  
633 during acute LCMV infection. *The Journal of experimental medicine*  
634 **211**:961–74. doi:10.1084/jem.20131556
- 635 Szajnik M, Czystowska M, Szczepanski MJ, Mandapathil M, Whiteside TL. 2010.  
636 Tumor-derived microvesicles induce, expand and up-regulate biological  
637 activities of human regulatory T cells (Treg). *PloS one* **5**:e11469.  
638 doi:10.1371/journal.pone.0011469
- 639 Tang Z, Li Chenwei, Kang B, Gao G, Li Cheng, Zhang Z. 2017. GEPIA: a web  
640 server for cancer and normal gene expression profiling and interactive  
641 analyses. *Nucleic acids research* **45**:W98–W102. doi:10.1093/nar/gkx247
- 642 Tatematsu M, Nishikawa F, Seya T, Matsumoto M. 2013. Toll-like receptor 3  
643 recognizes incomplete stem structures in single-stranded viral RNA. *Nature*  
644 *communications* **4**:1833. doi:10.1038/ncomms2857
- 645 Voss OH, Tian L, Murakami Y, Coligan JE, Krzewski K. 2015. Emerging role of  
646 CD300 receptors in regulating myeloid cell efferocytosis. *Molecular & cellular*  
647 *oncology* **2**:e964625. doi:10.4161/23723548.2014.964625
- 648 Wan YY, Flavell RA. 2007. ‘Yin–Yang’ functions of transforming growth factor -  
649  $\beta$  and T regulatory cells in immune regulation. *Immunological Reviews*  
650 **220**:199–213. doi:10.1111/j.1600-065X.2007.00565.x
- 651 Wang X, Luo G, Zhang K, Cao J, Huang C, Jiang T, Liu B, Su L, Qiu Z. 2018.  
652 Hypoxic Tumor-Derived Exosomal miR-301a Mediates M2 Macrophage  
653 Polarization via PTEN/PI3K  $\gamma$  to Promote Pancreatic Cancer Metastasis.  
654 *Cancer research* **78**:4586–4598. doi:10.1158/0008-5472.CAN-17-3841
- 655 Wang Y, Nakahashi-Oda C, Okayama Y, Shibuya A. 2019. Autonomous  
656 regulation of IgE-mediated mast cell degranulation and immediate  
657 hypersensitivity reaction by an inhibitory receptor CD300a. *The Journal of*  
658 *allergy and clinical immunology* **144**:323-327.e7.

- 659 doi:10.1016/j.jaci.2019.03.005
- 660 Wieckowski EU, Visus C, Szajnik M, Szczepanski MJ, Storkus WJ, Whiteside TL.  
661 2009. Tumor-Derived Microvesicles Promote Regulatory T Cell Expansion  
662 and Induce Apoptosis in Tumor-Reactive Activated CD8+ T Lymphocytes.  
663 *The Journal of Immunology* **183**:3720–3730. doi:10.4049/jimmunol.0900970
- 664 Witwer KW, Théry C. 2019. Extracellular vesicles or exosomes? On primacy,  
665 precision, and popularity influencing a choice of nomenclature. *J Extracell*  
666 *Vesicles* **8**:1648167. doi:10.1080/20013078.2019.1648167
- 667 Xiao W, Klement JD, Lu C, Ibrahim ML, Liu K. 2018. IFNAR1 Controls  
668 Autocrine Type I IFN Regulation of PD-L1 Expression in Myeloid-Derived  
669 Suppressor Cells. *Journal of immunology (Baltimore, Md: 1950)* **201**:264–277.  
670 doi:10.4049/jimmunol.1800129
- 671 Ying X, Wu Q, Wu X, Zhu Q, Wang Xinjing, Jiang L, Chen X, Wang Xipeng.  
672 2016. Epithelial ovarian cancer-secreted exosomal miR-222-3p induces  
673 polarization of tumor-associated macrophages. *Oncotarget* **7**:43076–43087.  
674 doi:10.18632/oncotarget.9246
- 675 Yotsumoto K, Okoshi Y, Shibuya K, Yamazaki S, Tahara-Hanaoka S, Honda S-I,  
676 Osawa M, Kuroiwa A, Matsuda Y, Tenen DG, Iwama A, Nakauchi H, Shibuya  
677 A. 2003. Paired activating and inhibitory immunoglobulin-like receptors,  
678 MAIR-I and MAIR-II, regulate mast cell and macrophage activation. *The*  
679 *Journal of experimental medicine* **198**:223–33. doi:10.1084/jem.20021825
- 680 Zitvogel L, Galluzzi L, Kepp O, Smyth MJ, Kroemer G. 2015. Type I interferons  
681 in anticancer immunity. *Nature Reviews Immunology* **15**:405–414.  
682 doi:10.1038/nri3845
- 683
